# Supplementary material
Source: PubMed Central journal article supplement (PMC4173997)
Supplement: supp_M048223_jlr.M048223-1.pdf [file supp_M048223_jlr.M048223-1.pdf]

Supplemental Table I: Body and liver weight of mice on different diets.

| <b>Diet</b>     | <b>Body weight</b><br>(g) |              | <b>Liver weight</b><br>(g) |             |
|-----------------|---------------------------|--------------|----------------------------|-------------|
|                 | <i>Young</i>              | <i>Aged</i>  | <i>Young</i>               | <i>Aged</i> |
| <b>Standard</b> | 32.26 ± 0.63              | 31.78 ± 1.87 | 1.38 ± 0.04                | 1.66 ± 0.28 |
| <b>SAA Def.</b> | 17.96 ± 0.43              | 21.00 ± 0.99 | 0.60± 0.03                 | 0.90 ± 0.06 |
| <b>0.5% OTC</b> | 20.23 ± 1.50              | 26.72 ± 1.72 | 0.81± 0.14                 | 1.22 ± 0.04 |
