# Supplementary material
Source: PubMed Central journal article supplement (PMC4173997)

Supplemental Fig. I: Activity of alkaline phosphatase (ALP, panel A) and alanine transaminase (ALT, panel B) in mice of different diets.

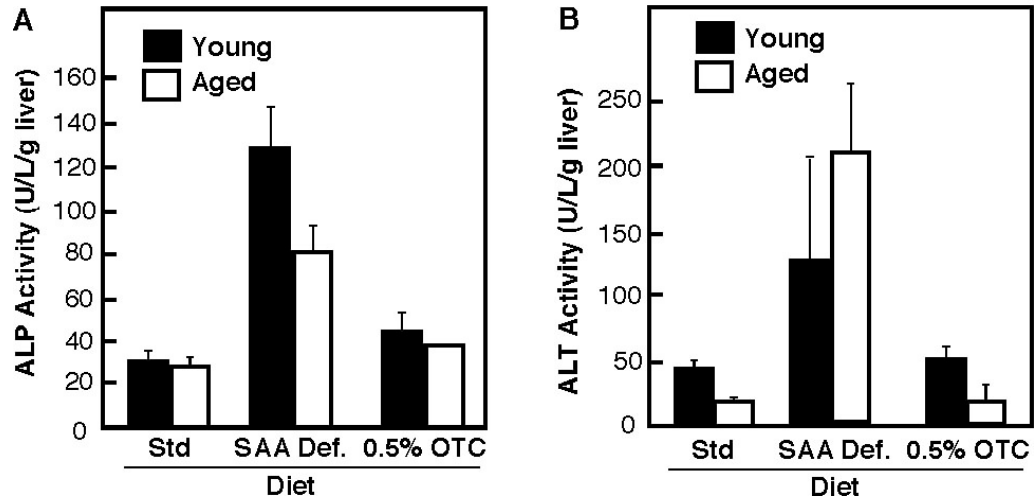

Supplement: supp_M048223_jlr.M048223-2.pdf [file supp_M048223_jlr.M048223-2.pdf]
